# Supplementary material
Source: publisher figshare collection journal article supplement (https://plos.figshare.com/articles/dataset/_/1274627)

**A**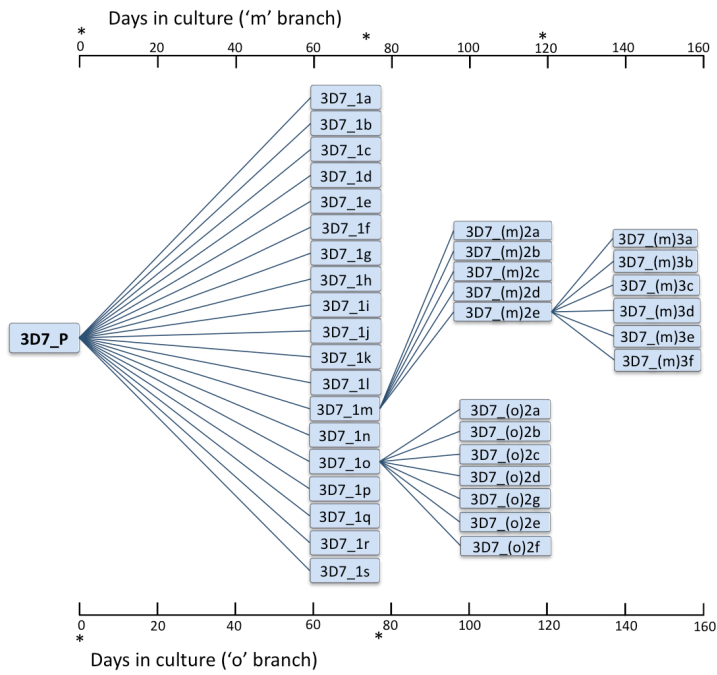**B**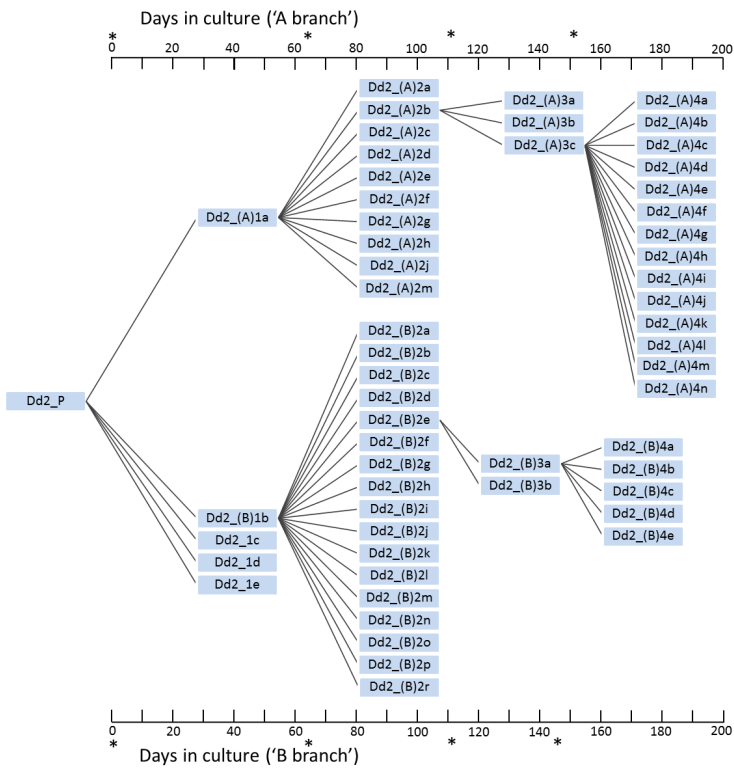

C

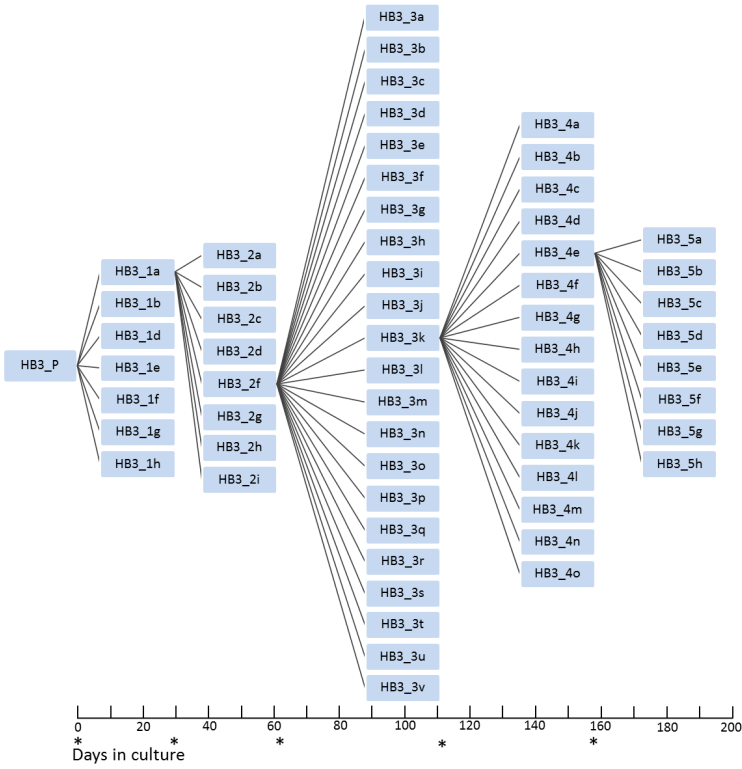

D

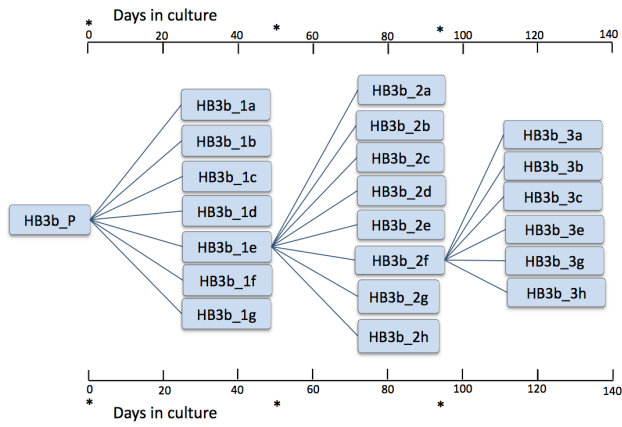

E

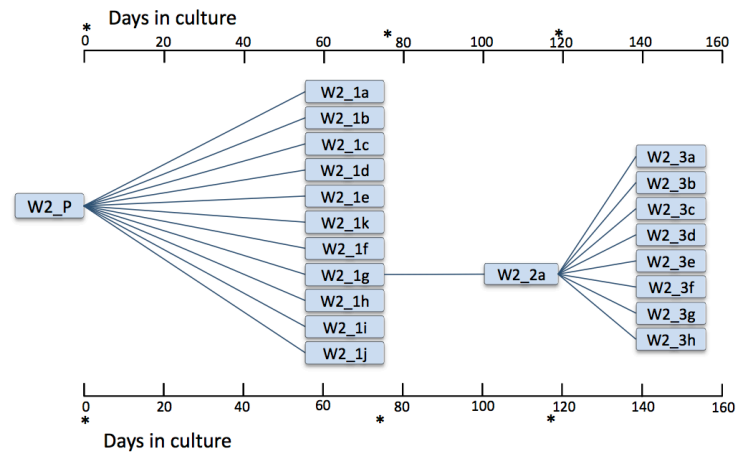

Supplement: Supplementary file [file 1]
